# Supplementary material for: Highly selective binding of methyl orange dye by cationic water-soluble pillar[5]arenes
Source: Royal Society of Chemistry journal article supplement (doi:10.1039/c6ob00539j), 2016-01-01
Supplement: c6ob00539j1.pdf [file c6ob00539j1.pdf]

## Highly selective binding of methyl orange dye by cationic water-soluble pillar[5]arenes

L. S. Yakimova, D. N. Shurpik, L. H. Gilmanova, A. R. Makhmutova, A. Rakhimbekova and I. I. Stoikov\*

Kazan Federal University, A.M. Butlerov Chemical Institute, 420008, Kremlevskaya Street, 18, Kazan, Russian Federation, [ivan.stoikov@mail.ru](mailto:ivan.stoikov@mail.ru)

### Electronic Supplementary Information (15 pages)

1. Synthetic scheme of the compounds **3**
2. NMR spectra of the compound **3**
3. Mass-spectrum (ESI) of pillar[5]arene **3**
4. <sup>1</sup>H NMR (DOSY) for the system **3/G8**
5. <sup>1</sup>H NMR spectra for host–guest complexes in solution
6. Determination of the stability constant and stoichiometry of the complex by the UV titration
7. UV spectra for the system host/guest
8. References

### 1. Synthetic scheme of the compounds 3

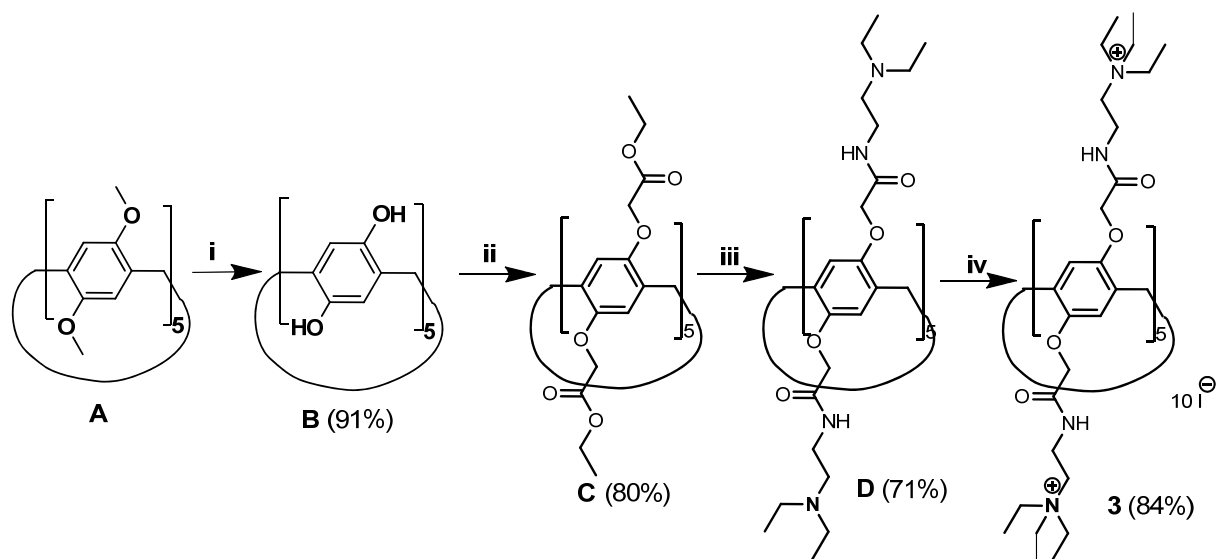

Initial 1,4-dimethoxypillar[5]arene **A** was obtained from commercially available 1,4-dimethoxybenzene by literary method.<sup>S1</sup> Further removal of methoxyl protections led to pillar[5]arene **B**.<sup>S2</sup> Pillar[5]arene with ethoxycarbonyl fragments **C** was obtained by the reaction of compound **B** with ethyl bromoacetate.

*1,4-Dimethoxypillar[5]arene (A)*. Product yield: 80 %. Mp: 249 °C, 248.8 °C.<sup>S1</sup> <sup>1</sup>H NMR (CDCl<sub>3</sub>) δ<sub>H</sub>, ppm: 3.74 (s, 30H, -OCH<sub>3</sub>), 3.76 (s, 10H, -CH<sub>2</sub>-), 6.80 (s, 10H, ArH). MALDI-TOF MS C<sub>45</sub>H<sub>50</sub>O<sub>10</sub>: calculated [M<sup>+</sup>] m/z = 750.3, found [M+Na]<sup>+</sup> m/z = 773.4, [M+K]<sup>+</sup> m/z = 789.5.

*Pillar[5]arene (B)*. Product yield: 91%. The decomposition was observed at 230°C without melting. <sup>1</sup>H NMR (CD<sub>3</sub>COCD<sub>3</sub>) δ<sub>H</sub>, ppm: 3.66 (s, 10H, -CH<sub>2</sub>-), 6.64 (s, 10H, ArH), 7.99 (s, 10H, -OH). MALDI-TOF MS C<sub>35</sub>H<sub>30</sub>O<sub>10</sub>: calculated [M<sup>+</sup>] m/z = 610.2, found [M+Na]<sup>+</sup> m/z = 633.1, [M+K]<sup>+</sup> m/z = 649.2.

*4,8,14,18,23,26,28,31,32,35-Deca-[(ethoxycarbonyl)methoxy]pillar[5]arene (C)*. Product yield: 80%. Mp: 199 °C, 196.7 °C.<sup>S1</sup> <sup>1</sup>H NMR (CDCl<sub>3</sub>) δ<sub>H</sub>, ppm (J/Hz): 0.96 (m, 30H, -CH<sub>2</sub>CH<sub>3</sub>), 3.86 (s, 10H, -CH<sub>2</sub>-), 4.09 (m, 20H, -CH<sub>2</sub>CH<sub>3</sub>), 4.55 (dd, 20H, O-CH<sub>2</sub>C(O)-), 7.04 (s, 10H, ArH). MALDI-TOF MS: calculated [M<sup>+</sup>] m/z = 1471.24, found [M+Na]<sup>+</sup> m/z = 1494.28.

*4,8,14,18,23,26,28,31,32,35-decakis-[(N-(2',2'-diethylaminoethyl)-carbamoylmethoxy)-pillar[5]arene (D)*. In a round-bottom flask equipped with magnetic stirrer, the compound **C** (0.30 g, 0.2 mmol), 10 ml methanol and *N,N*-diethylethan-1,2-diamine (0.35 g, 3.1 mmol, 0.43 ml) were refluxed for 72 hrs. The residue was dissolved in minimum amount of chloroform and washed several times with distilled water. The organic layer was separated and dried (mol. sieves, 3Å), the solvent was removed under reduced pressure. The residue was dried under reduced pressure during 30 min. Light-yellow viscous oil was received. Product yield: 0.52 g (71 %). <sup>1</sup>H NMR (CD<sub>3</sub>SOCD<sub>3</sub>) δ<sub>H</sub>, ppm (J/Hz): 0.91 (t, 60H, <sup>3</sup>J<sub>HH</sub> = 7.1, -N(CH<sub>2</sub>CH<sub>3</sub>)<sub>2</sub>), 2.41-2.52 (m, 60H, -CH<sub>2</sub>CH<sub>2</sub>-N(CH<sub>2</sub>CH<sub>3</sub>)<sub>2</sub>), 3.24 (m, 20H, -CH<sub>2</sub>CH<sub>2</sub>-N(CH<sub>2</sub>CH<sub>3</sub>)<sub>2</sub>), 3.79 (s, 10H, -CH<sub>2</sub>-), 4.32 (s, 20H, O-CH<sub>2</sub>C(O)-), 6.85 (s, 10H, ArH), 7.86 (t, 10H, <sup>3</sup>J<sub>HH</sub> = 5.2, -C(O)NH). <sup>13</sup>C NMR (CD<sub>3</sub>SOCD<sub>3</sub>) δ<sub>C</sub> ppm: 167.64, 148.95, 127.97, 114.71, 67.71, 51.37, 46.47, 36.59, 28.80, 11.75. <sup>1</sup>H-<sup>1</sup>H NOESY (NOE) (the major cross-peaks): H<sup>8</sup>/H<sup>4</sup>; H<sup>7</sup>/H<sup>4</sup>; H<sup>5</sup>/H<sup>4</sup>; H<sup>2</sup>/H<sup>4</sup>; H<sup>3</sup>/H<sup>4</sup>; H<sup>1</sup>/H<sup>4</sup>; H<sup>1</sup>/H<sup>8</sup>; H<sup>1</sup>/H<sup>7</sup>; H<sup>1</sup>/H<sup>5</sup>; H<sup>1</sup>/H<sup>5</sup>; H<sup>1</sup>/H<sup>2</sup>; H<sup>1</sup>/H<sup>3</sup>; H<sup>3</sup>/H<sup>8</sup>; H<sup>3</sup>/H<sup>7</sup>; H<sup>3</sup>/H<sup>5</sup>; H<sup>3</sup>/H<sup>1</sup>; H<sup>2</sup>/H<sup>8</sup>; H<sup>2</sup>/H<sup>7</sup>; H<sup>2</sup>/H<sup>5</sup>; H<sup>2</sup>/H<sup>3</sup>; H<sup>5</sup>/H<sup>6</sup>; H<sup>8</sup>/H<sup>7</sup>. IR ν cm<sup>-1</sup>: 3311.05 (N-H), 1661.33 (C=O). MALDI-TOF MS: calculated [M<sup>+</sup>] m/z = 2172.4, found [M+H]<sup>+</sup> m/z = 2173.4,

$[M+Na]^+$   $m/z = 2195.4$ . Found: C, 63.57; H, 8.81; N, 12.89.  $C_{115}H_{190}N_{20}O_{20}$ . Calculated for  $C_{115}H_{190}N_{20}O_{20}$ : C, 63.02; H, 8.55; N, 12.49.

### *General procedure of the synthesis of the compounds 3*

Equimolar amount of ethyl iodide was added to the solution of the compound **D** (0.30 g, 0.14 mmol) in 10 ml acetonitrile. Reaction mixture was refluxed for 72 hrs and solvent was removed under reduced pressure. The powder obtained was dried under reduced pressure ( $P_2O_5$ ).

#### *4,8,14,18,23,26,28,31,32,35-decakis-[(N-(2',2',2'-triethylaminoethyl)-carbamoylmethoxy]-pillar[5]arene*

**3. Product yield:** 0.52 g (84 %). Mp: 153 °C.  $^1H$  NMR ( $D_2O$ )  $\delta_H$ , ppm ( $J/Hz$ ): 1.31 (t, 90H,  $^3J_{HH} = 7.0Hz$ , -N(CH $_2$ CH $_3$ ) $_3$ ), 3.36 (m, 80H, -CH $_2$ CH $_2$ -N(CH $_2$ CH $_3$ ) $_3$ ), 3.63-3.85 (m, 20H, -CH $_2$ CH $_2$ -N(CH $_2$ CH $_3$ ) $_3$ ), 3.98 (s, 10H, -CH $_2$ -), 4.08 (d, 10H, AB-system,  $^2J_{HH} = 15.0$ , O-CH $_2$ C(O)NH-), 4.37 (d, 10H, AB-system,  $^2J_{HH} = 15.0$ , O-CH $_2$ C(O)NH-), 6.73 (s, 10H, ArH).  $^{13}C$  NMR ( $CD_3SOCD_3$ )  $\delta_C$  ppm: 168.95, 148.30, 127.45, 114.61, 66.94, 52.94, 52.94, 52.38, 32.28, 28.56, 7.21. IR  $\nu$   $cm^{-1}$ : 3331.5 (-N $^+$ -(CH $_2$ CH $_3$ ) $_3$ ), 2975.3 (-CH $_2$ -CH $_3$ , -CH $_2$ -), 1665.9 (C=O). ESI: calcd for  $[M - 4 I]^{4+}$   $m/z = 806.2$ ,  $[M - 5 I]^{5+}$   $m/z = 619.6$ ,  $[M - 6 I]^{6+}$   $m/z = 496.8$  found  $m/z = 806.1$ , 619.5, 495.2; Found: C, 57.4; H, 8.23; N, 9.65.  $C_{135}H_{240}Cl_{10}N_{20}O_{20}$ . Calculated for  $C_{135}H_{240}Cl_{10}N_{20}O_{20}$ : C, 57.54; H, 8.58; N, 9.94.

## 2. NMR spectra of the compound 3

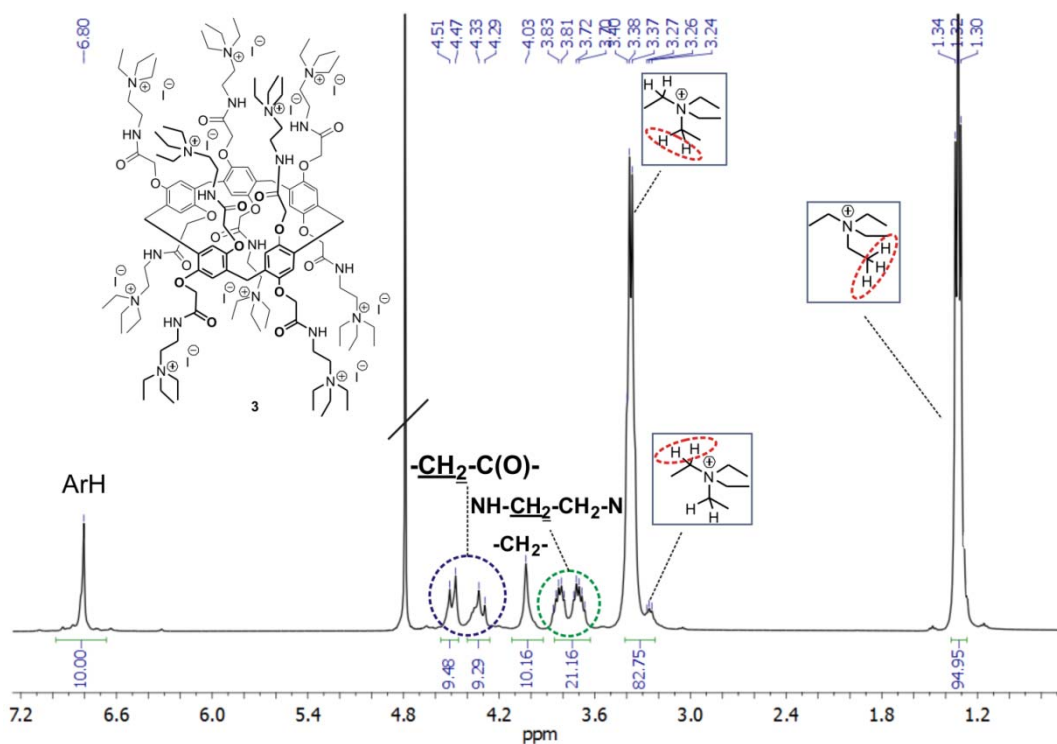

Fig. S1.  $^1\text{H}$  NMR spectrum of the compound 3 ( $\text{D}_2\text{O}$ , 293K, Bruker Avance-400, 400MHz).

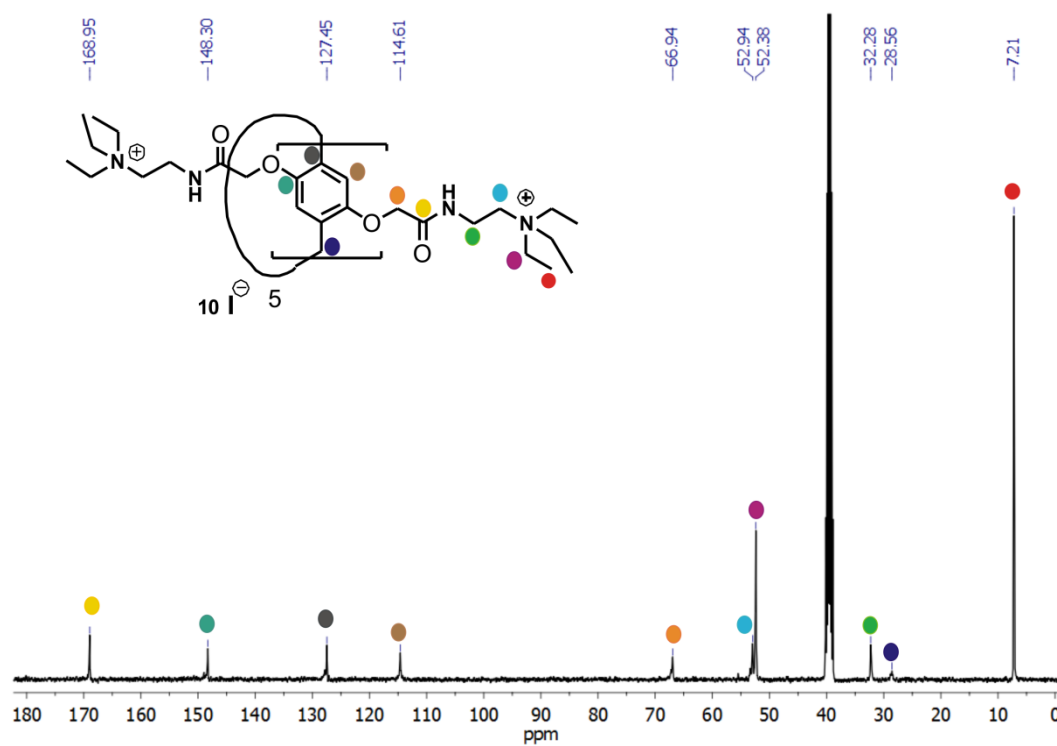

Fig. S2.  $^{13}\text{C}$   $\{^1\text{H}\}$  NMR spectrum of the compound 3 ( $\text{D}_2\text{O}$ , 293K, Bruker Avance-400, 125MHz).

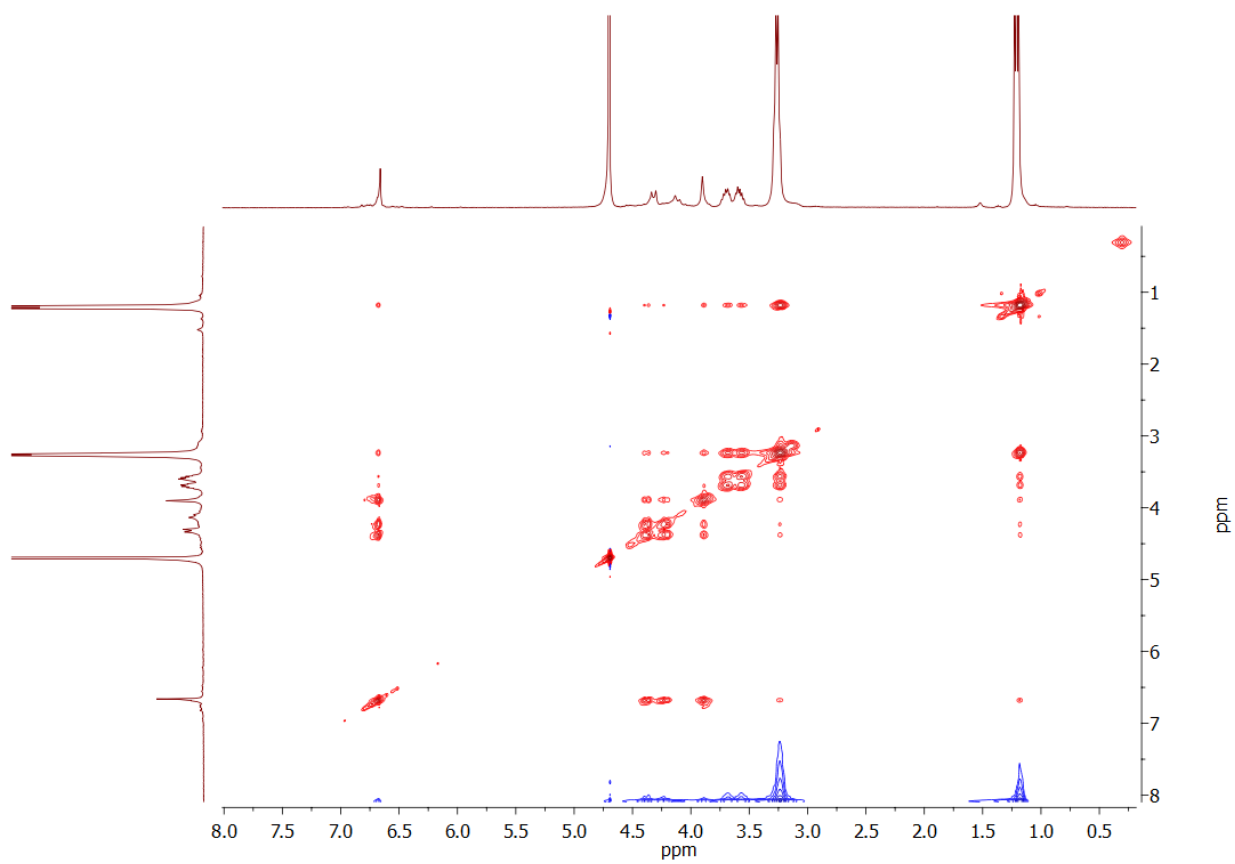

**Fig. S3.** 2D  $^1\text{H}$ - $^1\text{H}$  NOESY (500 MHz) analysis of **3** in  $\text{D}_2\text{O}$ . The host concentration is 0.0112 M.

### 3. Mass-spectrum (ESI) of pillar[5]arene 3

ESI Result. Institute of Organic and Physical Chemistry

#### Analysis Info

Method  
Sample Name  
Comment

Operator  
Instrument

#### Acquisition Parameter

|                   |             |              |           |                          |          |
|-------------------|-------------|--------------|-----------|--------------------------|----------|
| Ion Source Type   | ESI         | Ion Polarity | Positive  | Alternating Ion Polarity | off      |
| Mass Range Mode   | UltraScan   | Scan Begin   | 100 m/z   | Scan End                 | 2800 m/z |
| Capillary Exit    | 140.0 V     | n/a          | n/a       | Trap Drive               | 73.0     |
| Accumulation Time | 710 $\mu$ s | Averages     | 5 Spectra | Auto MS/MS               | off      |

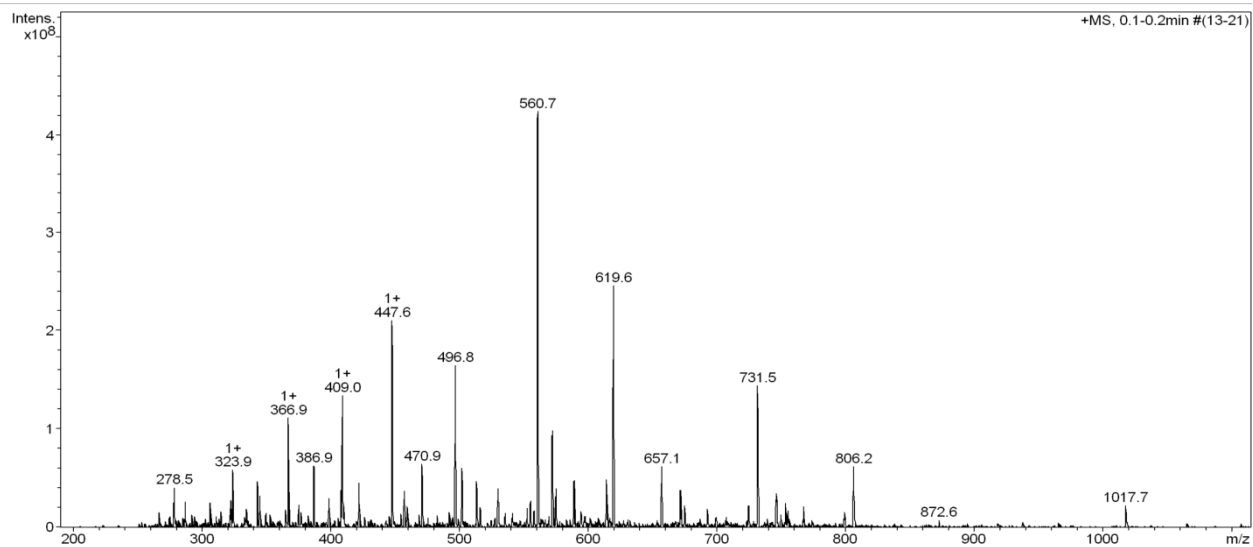

Fig. S4. Mass spectrum (ESI) of the compound 3

#### 4. $^1\text{H}$ NMR (DOSY) for the system 3/G8

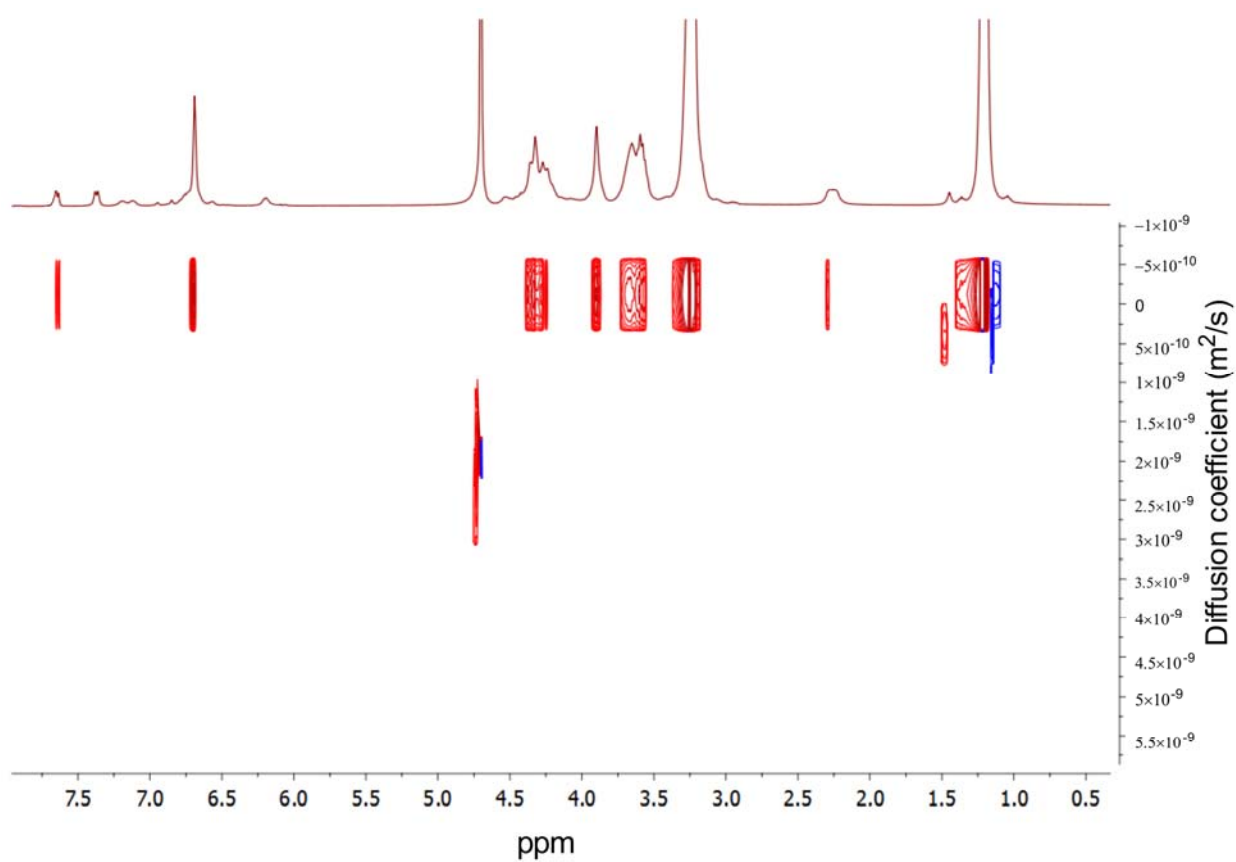

**Fig. S5.**  $^1\text{H}$  NMR (DOSY) spectrum for the system **3/G8** ( $\text{D}_2\text{O}$ , 293K, Bruker Avance-400, 400 MHz).

**Table S1.** Diffusion coefficients of pure **3**, **G8** and **3/G8** complex in  $\text{D}_2\text{O}$  (293K, Bruker Avance-400, 400 MHz).

| Compounds   | $D$ ( $10^{-10} \text{ m}^2 \text{ s}^{-1}$ ) |
|-------------|-----------------------------------------------|
| <b>3</b>    | 3.43                                          |
| <b>G8</b>   | 2.21                                          |
| <b>3/G8</b> | 1.21                                          |

## 5. $^1\text{H}$ NMR spectra for host-guest complexation in solution

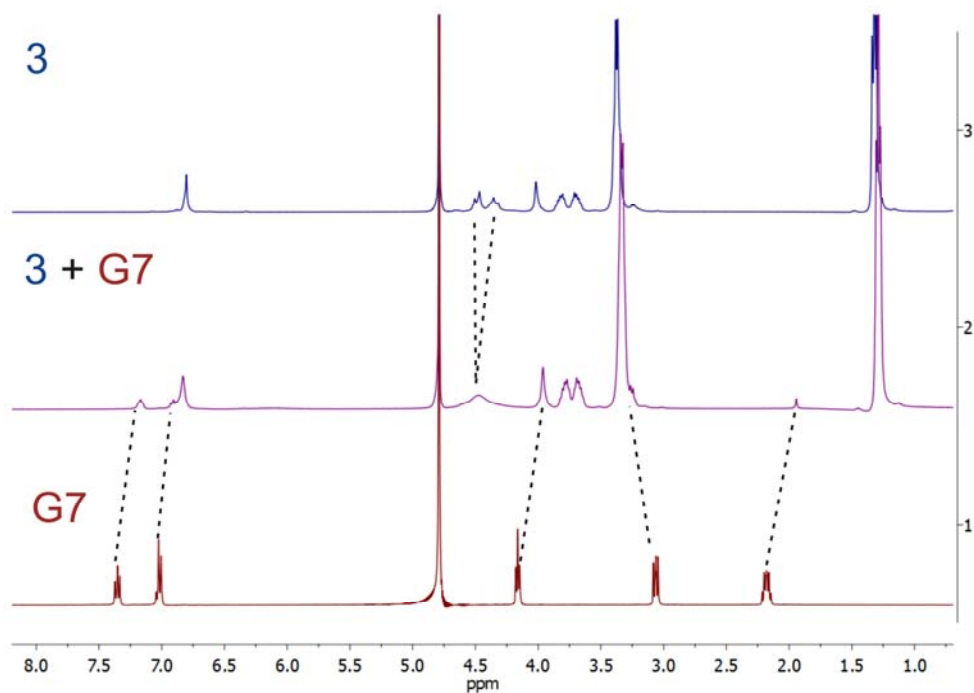

Fig.S6.  $^1\text{H}$  NMR spectra ( $\text{D}_2\text{O}$ , 293K, 400MHz): **G7** (0.0112 mol/l); **G7** (0.0112 mol/l) + **3** (0.0112 mol/l); **3** (0.0112 mol/l)

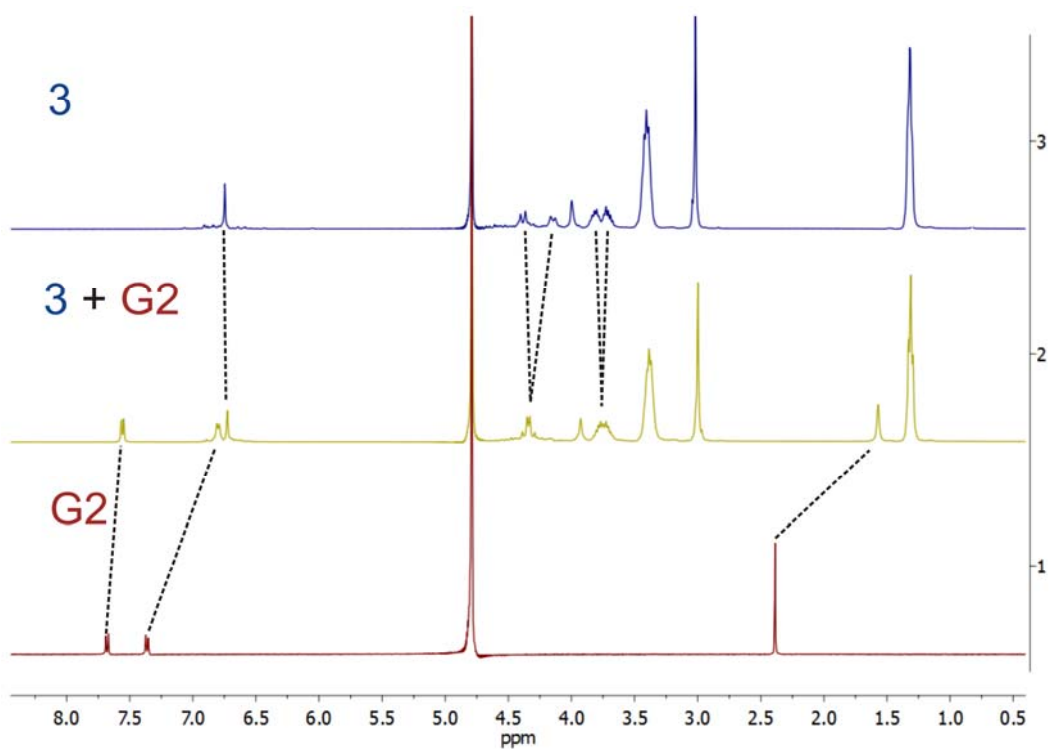

Fig.S7.  $^1\text{H}$  NMR spectra ( $\text{D}_2\text{O}$ , 293K, 400MHz): **G2** (0.0112 mol/l); **G2** (0.0112 mol/l) + **3** (0.0112 mol/l); **3** (0.0112 mol/l)



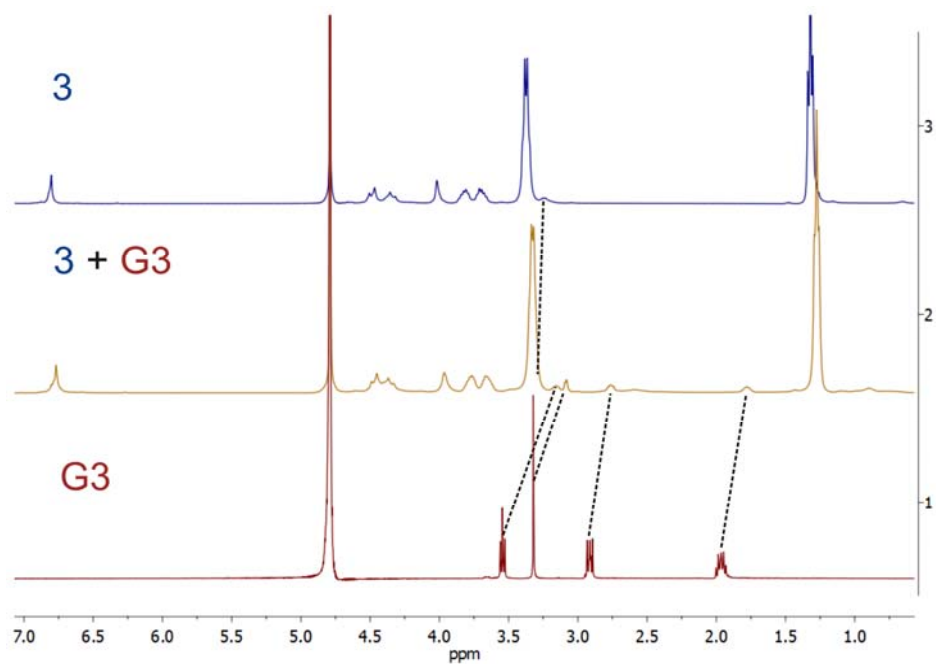

**Fig.S8.** <sup>1</sup>H NMR spectra (D<sub>2</sub>O, 293K, 400MHz): **G3** (0.0112 mol/l); **G3** (0.0112 mol/l) + **3** (0.0112 mol/l); **3** (0.0112 mol/l)

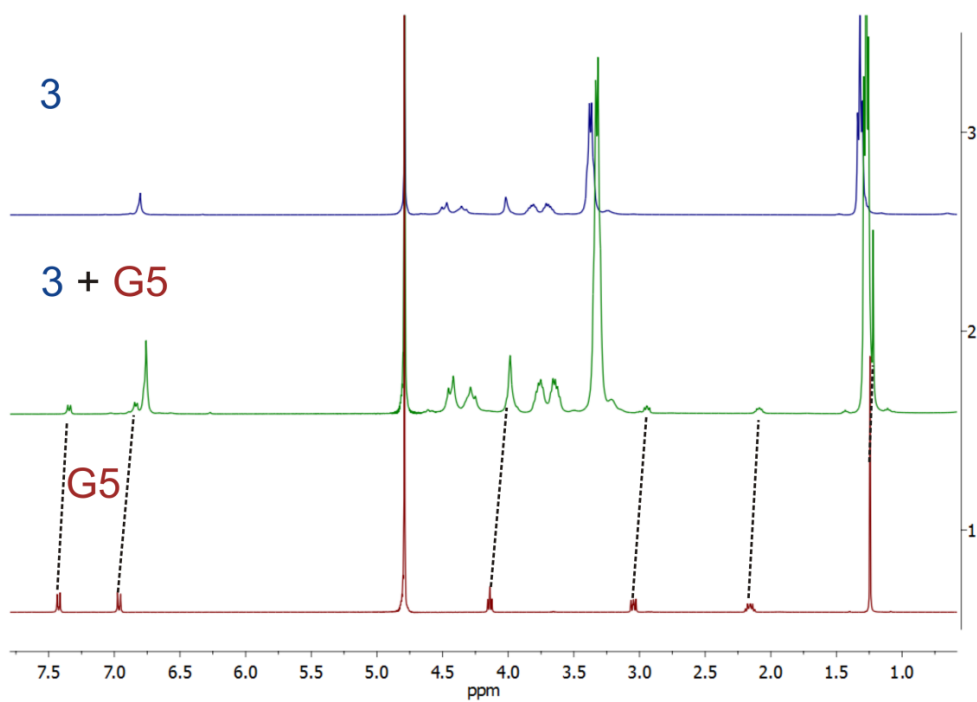

**Fig.S9.** <sup>1</sup>H NMR spectra (D<sub>2</sub>O, 293K, 400MHz): **G5** (0.0112 mol/l); **G5** (0.0112 mol/l) + **3** (0.0112 mol/l); **3** (0.0112 mol/l)

## 6. Determination of the stability constant and stoichiometry of the complex by the UV titration

The UV measurements were performed with “Shimadzu UV-3600” instrument. The  $1 \cdot 10^{-3}$  M solution of the guest (10, 20, 30, 40, 50, 60, 70, 80, 90 and 100  $\mu$ l) in water was added to 0.5 ml of the solution of host ( $3 \cdot 10^{-4}$  M) in water and diluted to final volume of 3 ml with water. The UV spectra of the solutions were then recorded. The stability constant and stoichiometry of complexes were calculated as described below. Three independent experiments were carried out for each series. Student’s *t*-test was applied in statistical data processing.

The system equilibrium is described by Eq. (1), where H, G,  $G_nH$  denote the macrocycles **1-3**, guests **G1-G8**, complex with guests, *n* – number of the guest with one macrocycle.

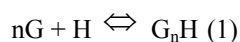

The association constant,  $K_{ass}$ , is defined by Eq. (2).

$$K_{ass} = [G_nH] / [G]^n [H] \quad (2)$$

To determine the stoichiometry coefficient *n* of the complexes forming in the water Eq. (2) was converted into Eq. (3).

$$\lg K_{ass} = \lg [G_nH] - n \lg [G] - \lg [H] \quad (3)$$

The solution absorbance *A*, is a sum of those related to complex, host and guest ( $A_{G_nH}$ ,  $A_H$  and  $A_G$ , respectively) is equal to:

$$A = A_{G_nH} + A_H + A_G \quad (4)$$

Assuming that the Beer-Lambert law is obeyed for all the components considered Eq. 5, the absorbance *A* is expressed as:

$$A_i = c_i \varepsilon_i l \quad (5)$$

where  $c_i$  is a molar concentration of *i*-species,  $\varepsilon_i$  is the molar absorptivity, and *l* is the cell thickness. For complexation between the host and guest the absorbance measurement is commonly conducted at the wavelength of absorbance maximum in the charge-transfer region where  $A_G=0$ . This gives Eq. 6.

$$A = A_{G_nH} + A_H \quad (6)$$

Concentration of the complex  $[G_nH]$  in the system is calculated according to equations (5) and (6).

The plot of  $\lg [G_nH] - \lg [H]$  versus  $\lg [G]$  (Fig. 1) presents a straight line, slope of which equals to *n*. Association constants  $K_{ass}$  are calculated using the intercept values (b).

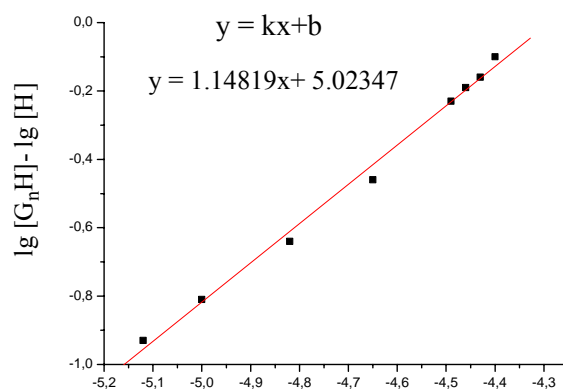

lg [G]

**Fig. S10.** Plot of  $\lg [G_nH] - \lg [H]$  versus  $\lg [G]$  host/guest system.

$$b = \lg K_{acc} \quad (7)$$

## 7. UV spectra for the systems host/guest

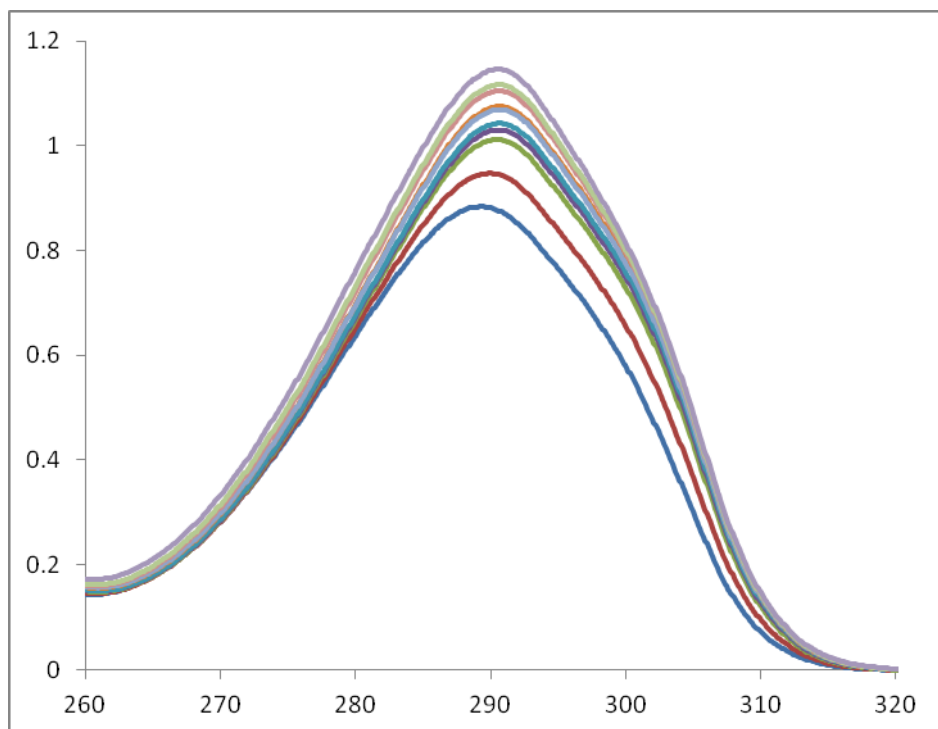

**Fig.S11.** The spectrophotometric titration of the systems pillar[5]arene **2** and guests **G4** in water. The molar ratio of the host and guest is changed from 0.7:1 to 6.7:1 (0.7:1, 1.3:1, 2:1, 2.7:1, 3.3:1, 4:1, 4.7:1, 5.3:1, 6:1, 6.7:1).

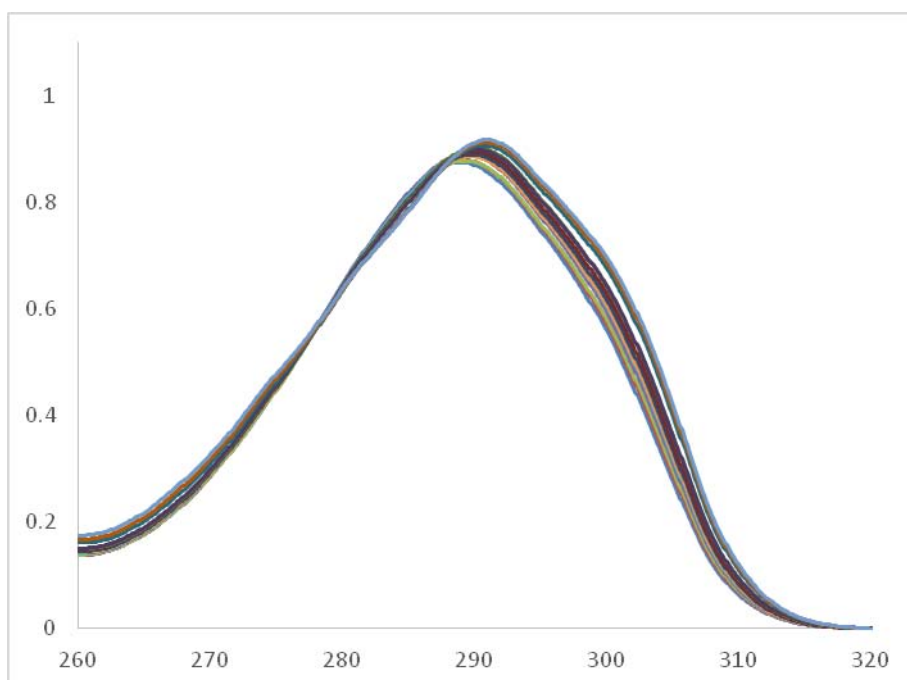

**Fig.S12.** The spectrophotometric titration of the systems pillar[5]arene **2** and guests **G7** in water. The molar ratio of the host and guest is changed from 0.7:1 to 6.7:1 (0.7:1, 1.3:1, 2:1, 2.7:1, 3.3:1, 4:1, 4.7:1, 5.3:1, 6:1, 6.7:1).

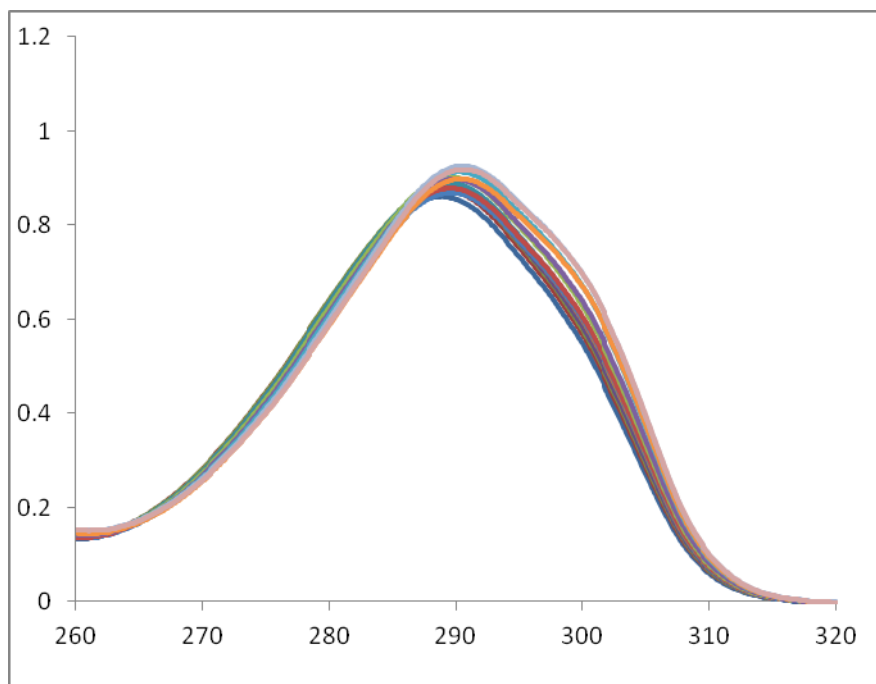

**Fig.S13.** The spectrophotometric titration of the systems pillar[5]arene **2** and guests **G2** in water. The molar ratio of the host and guest is changed from 0.7:1 to 6.7:1 (0.7:1, 1.3:1, 2:1, 2.7:1, 3.3:1, 4:1, 4.7:1, 5.3:1, 6:1, 6.7:1).

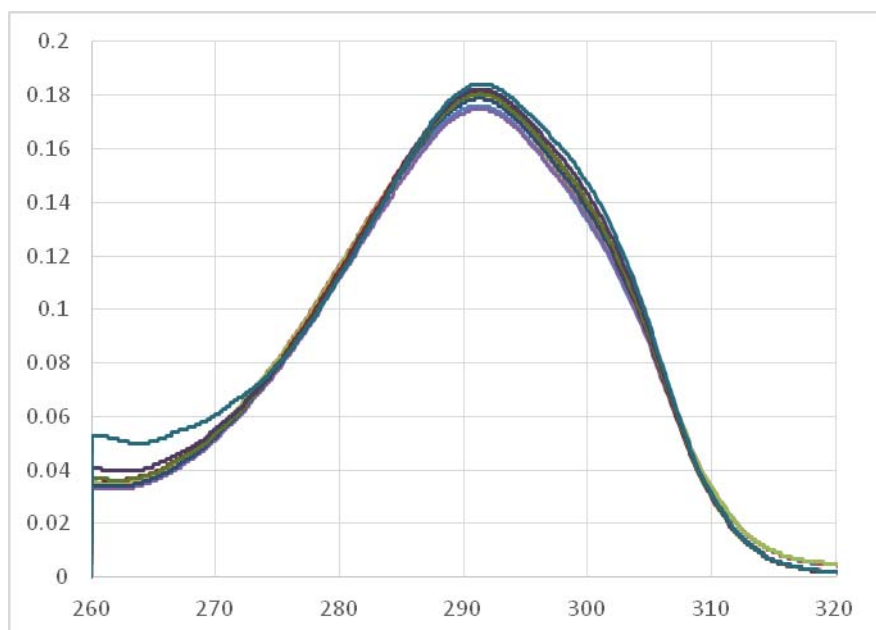

**Fig.S14.** The spectrophotometric titration of the systems pillar[5]arene **1** and guests **G2** in water. The molar ratio of the host and guest is changed from 0.7:1 to 6.7:1 (0.7:1, 1.3:1, 2:1, 2.7:1, 3.3:1, 4:1, 4.7:1, 5.3:1, 6:1, 6.7:1).

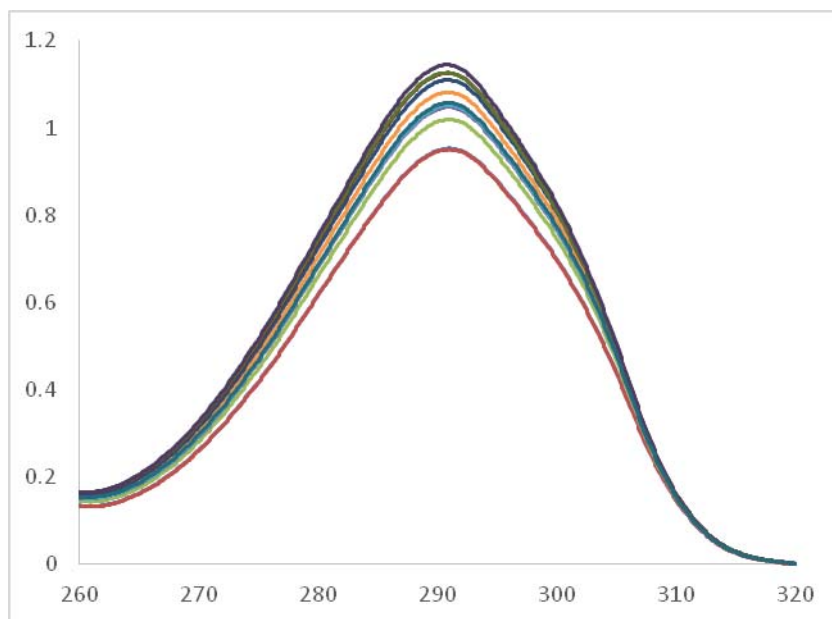

**Fig.S15.** The spectrophotometric titration of the systems pillar[5]arene **1** and guests **G4** in water. The molar ratio of the host and guest is changed from 0.7:1 to 6.7:1 (0.7:1, 1.3:1, 2:1, 2.7:1, 3.3:1, 4:1, 4.7:1, 5.3:1, 6:1, 6.7:1).

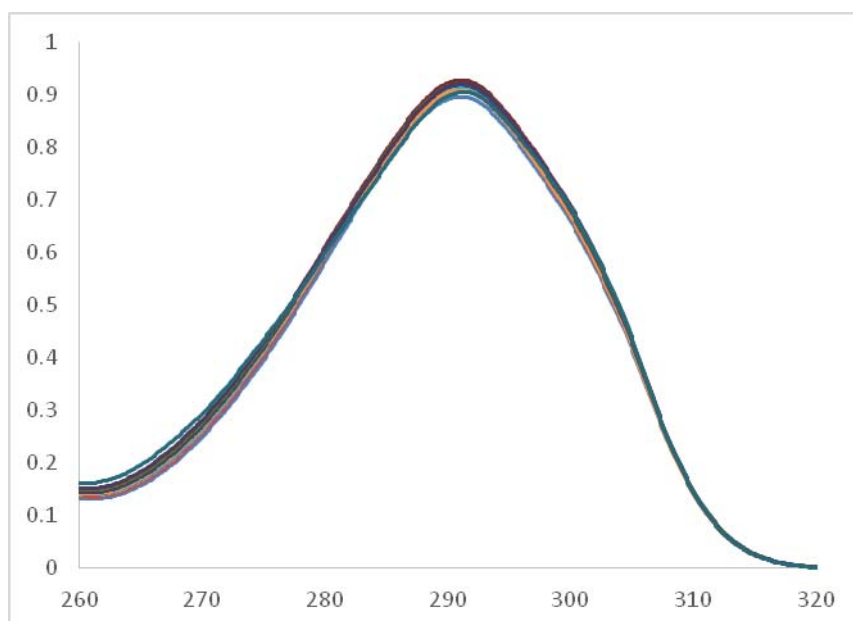

**Fig.S16.** The spectrophotometric titration of the systems pillar[5]arene **1** and guests **G7** in water. The molar ratio of the host and guest is changed from 0.7:1 to 6.7:1 (0.7:1, 1.3:1, 2:1, 2.7:1, 3.3:1, 4:1, 4.7:1, 5.3:1, 6:1, 6.7:1).

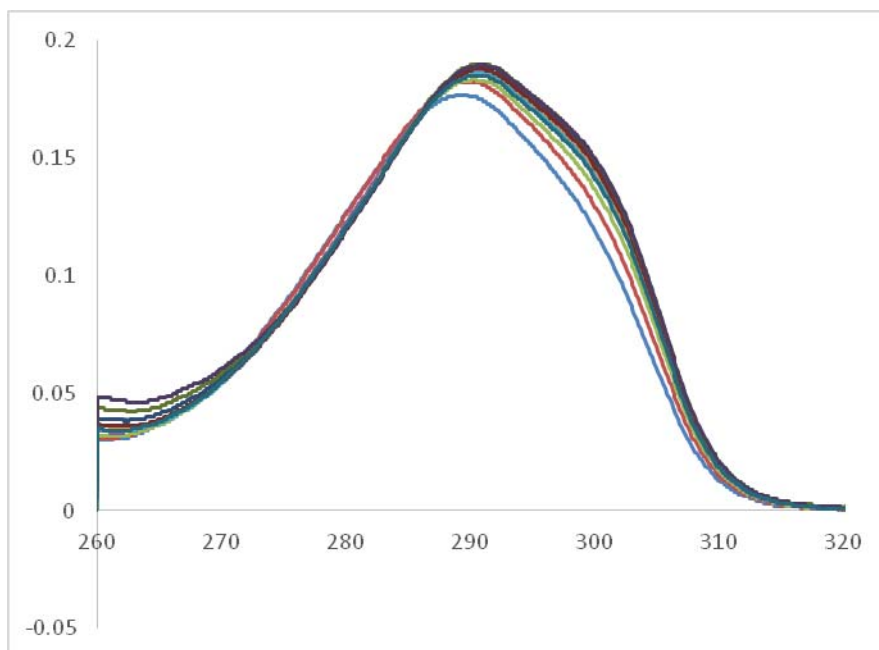

**Fig.S17.** The spectrophotometric titration of the systems pillar[5]arene **3** and guests **G1** in water. The molar ratio of the host and guest is changed from 0.7:1 to 6.7:1 (0.7:1, 1.3:1, 2:1, 2.7:1, 3.3:1, 4:1, 4.7:1, 5.3:1, 6:1, 6.7:1).

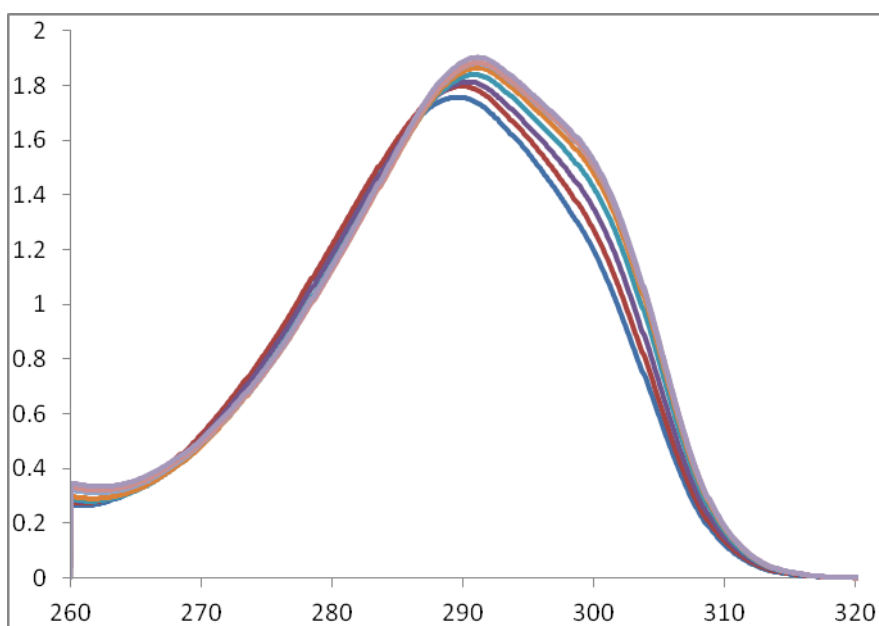

**Fig.S18.** The spectrophotometric titration of the systems pillar[5]arene **3** and guests **G2** in water. The molar ratio of the host and guest is changed from 0.7:1 to 6.7:1 (0.7:1, 1.3:1, 2:1, 2.7:1, 3.3:1, 4:1, 4.7:1, 5.3:1, 6:1, 6.7:1).

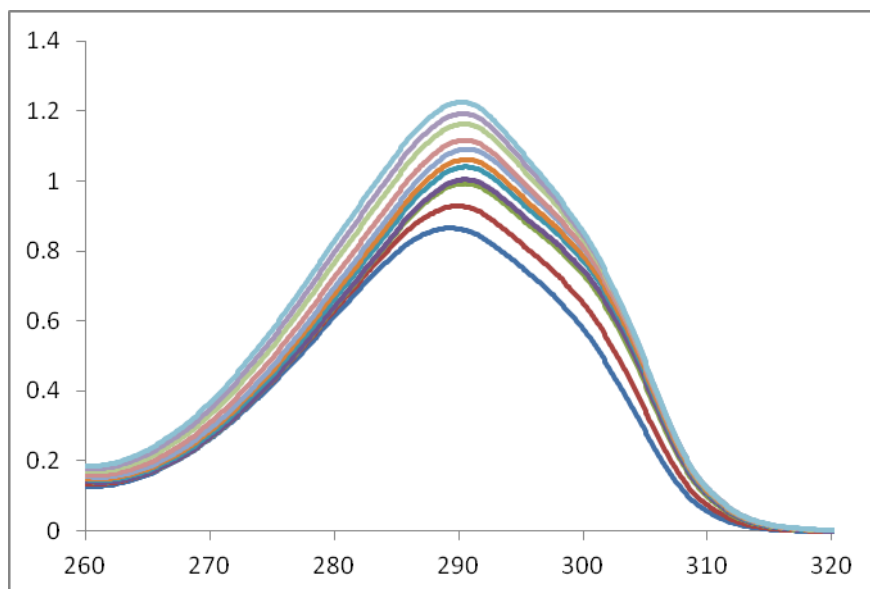

**Fig.S19.** The spectrophotometric titration of the systems pillar[5]arene **3** and guests **G4** in water. The molar ratio of the host and guest is changed from 0.7:1 to 6.7:1 (0.7:1, 1.3:1, 2:1, 2.7:1, 3.3:1, 4:1, 4.7:1, 5.3:1, 6:1, 6.7:1).

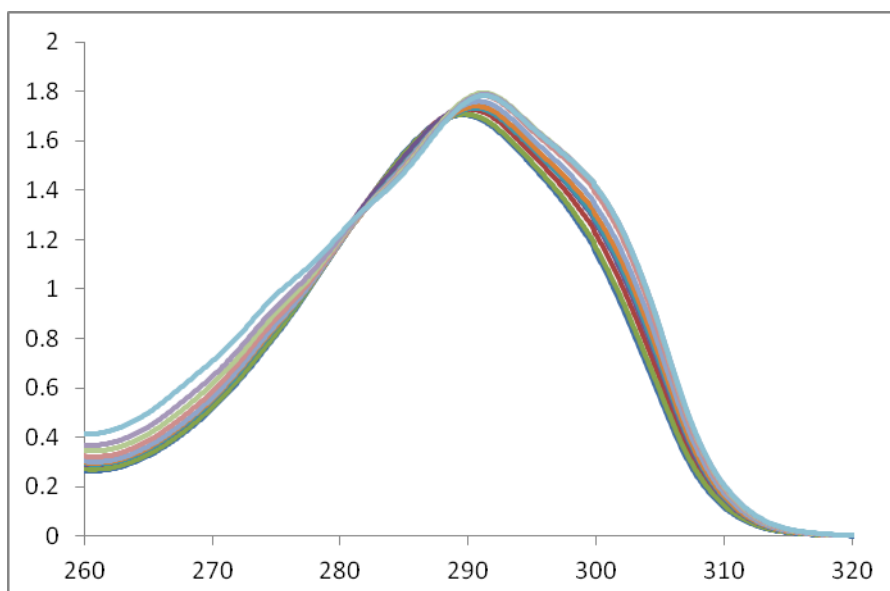

**Fig.S20.** The spectrophotometric titration of the systems pillar[5]arene **3** and guests **G7** in water. The molar ratio of the host and guest is changed from 0.7:1 to 6.7:1 (0.7:1, 1.3:1, 2:1, 2.7:1, 3.3:1, 4:1, 4.7:1, 5.3:1, 6:1, 6.7:1).



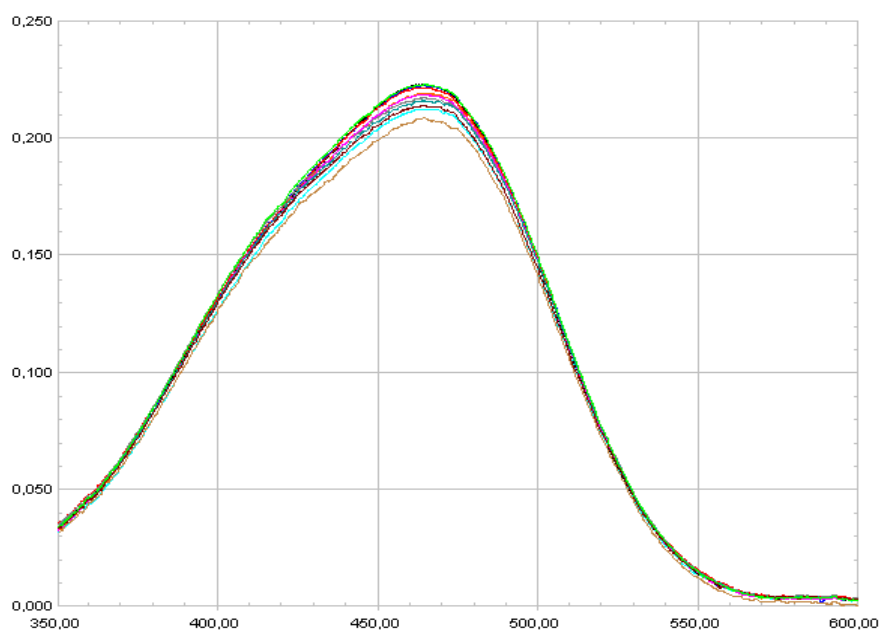

**Fig.S21.** The spectrophotometric titration of the systems pillar[5]arene **1** and guests **G8** in water. The molar ratio of the host and guest is changed from 0.3:1 to 2:1 (0.3:1, 0.5:1, 0.8:1, 0.9:1, 1:1, 1.1:1, 1.3:1, 1.5:1, 2:1).

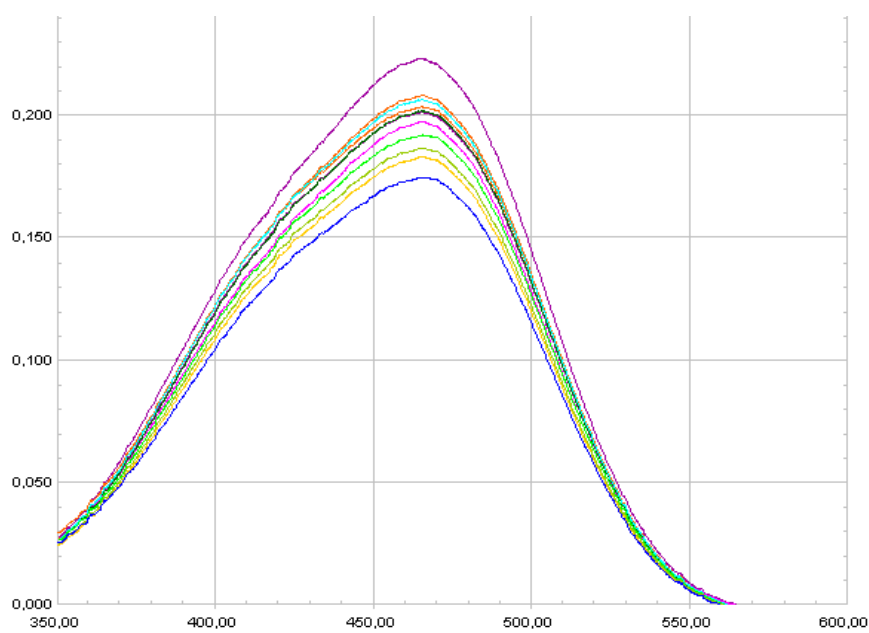

**Fig.S22.** The spectrophotometric titration of the systems pillar[5]arene **2** and guests **G8** in water. The molar ratio of the host and guest is changed from 0.3:1 to 2:1 (0.3:1, 0.5:1, 0.8:1, 0.9:1, 1:1, 1.1:1, 1.3:1, 1.5:1, 2:1).

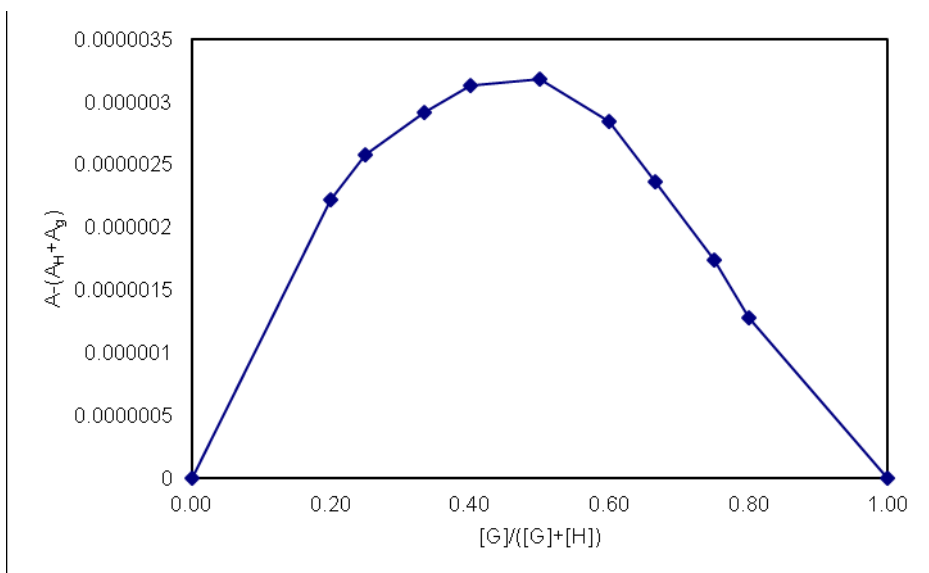

**Fig.S23.** The Job's plot for the determination of the stoichiometry in the complex of the systems pillar[5]arenes **3** and guest **G2** in water.

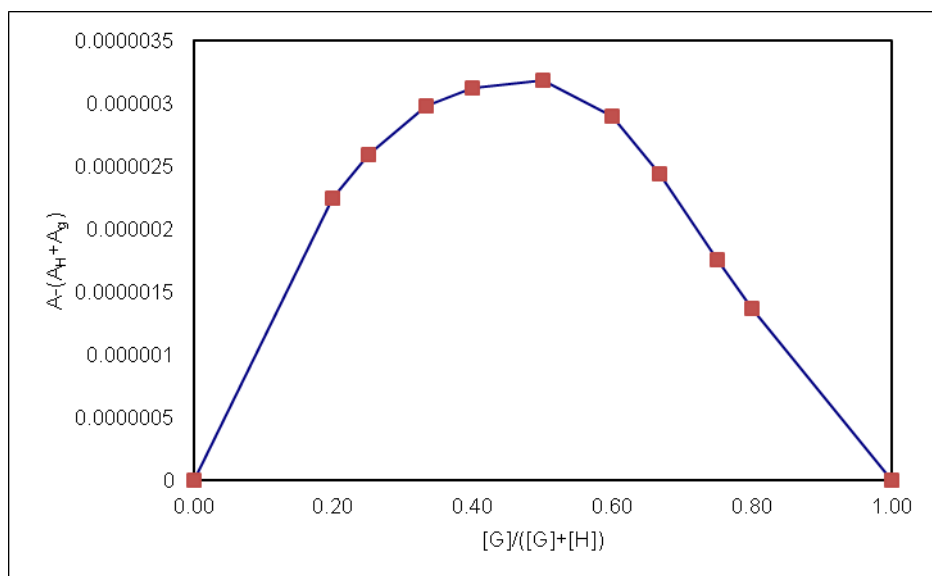

**Fig.S24.** The Job's plot for the determination of the stoichiometry in the complex of the systems pillar[5]arenes **2** and guests **G8** in water.

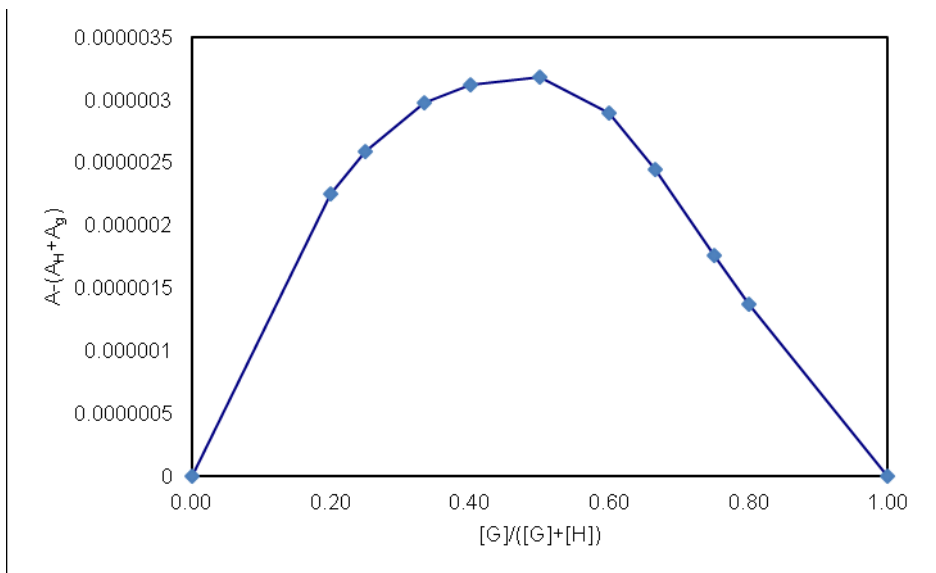

**Fig.S25.** The Job's plot for the determination of the stoichiometry in the complex of the systems pillar[5]arenes **1** and guests **G7** in water.

## 8. References

- S1. T. Boinski and A. Szumna, *Tetrahedron*, 2012, **68**, 9419.
- S2. T. Ogoshi, T. Aoki, K. Kitajima, S. Fujinami, T. Yamagishi and Y. Nakamoto, *J. Org. Chem.*, 2011, **76** (1), 328.
